# Supplementary material
Source: Springer Nature journal article supplement (https://www.springermedizin.de/resource/supplementary/12885_2013_4350_MOESM2_ESM.pdf/9466100)

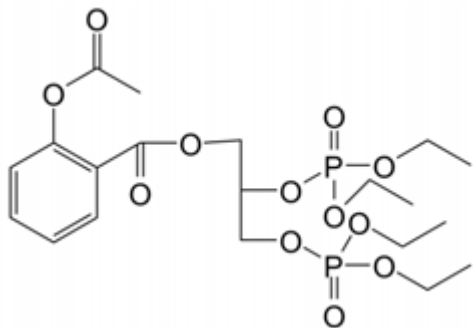

Phospho-aspirin-2 (PA-2, MDC-22)

| Drug    | 24 h IC <sub>50</sub> , $\mu$ M                |            |          |
|---------|------------------------------------------------|------------|----------|
|         | <i>(fold enhancement over parent compound)</i> |            |          |
|         | MDA-MB-468                                     | MDA-MB-231 | BT-20    |
| Aspirin | >1,500                                         | >2,000     | >2000    |
| PA-2    | 198 (>7)                                       | 360 (>6)   | 440 (>5) |

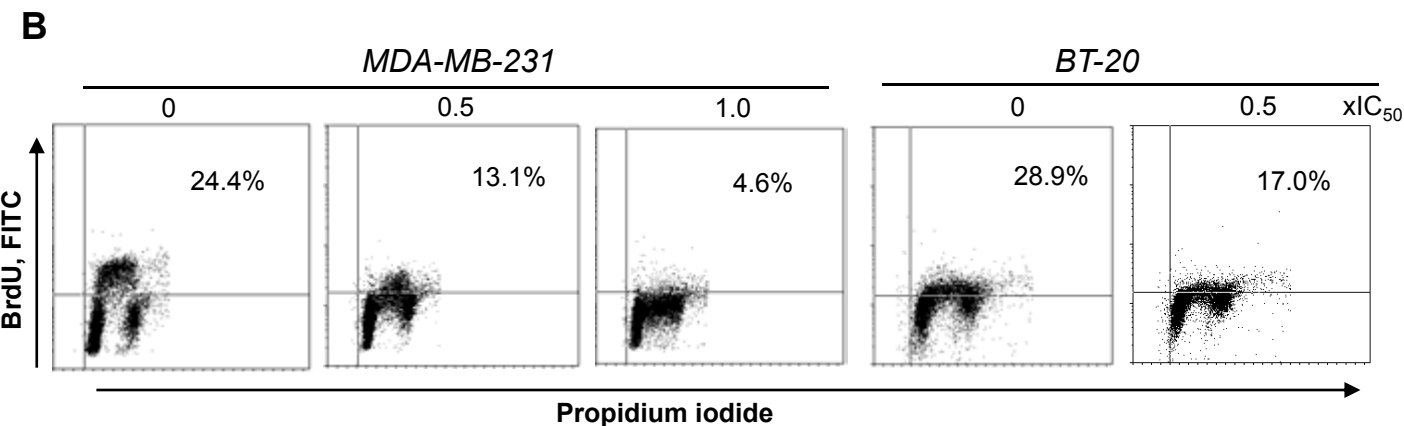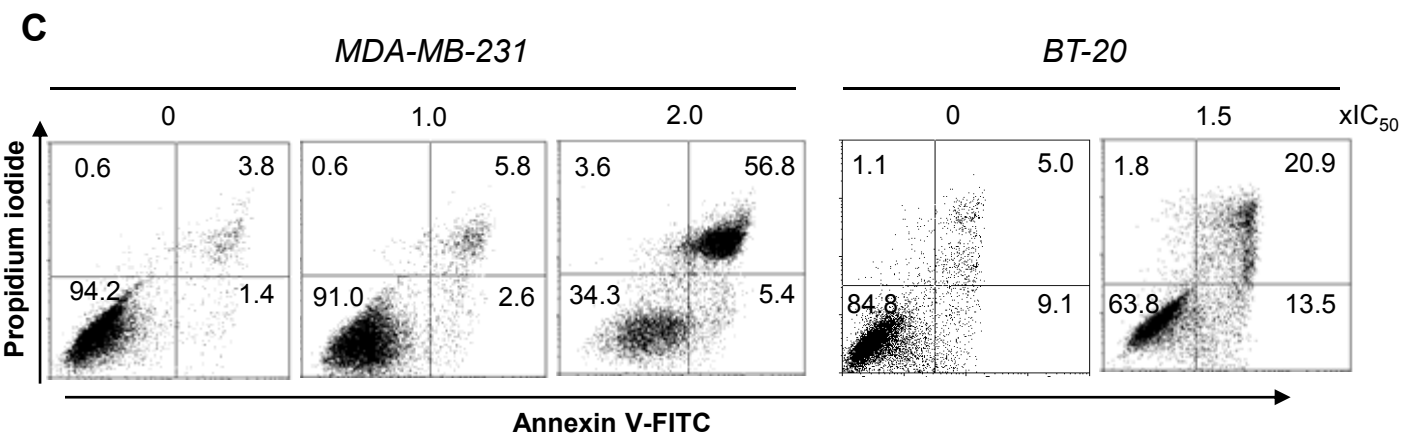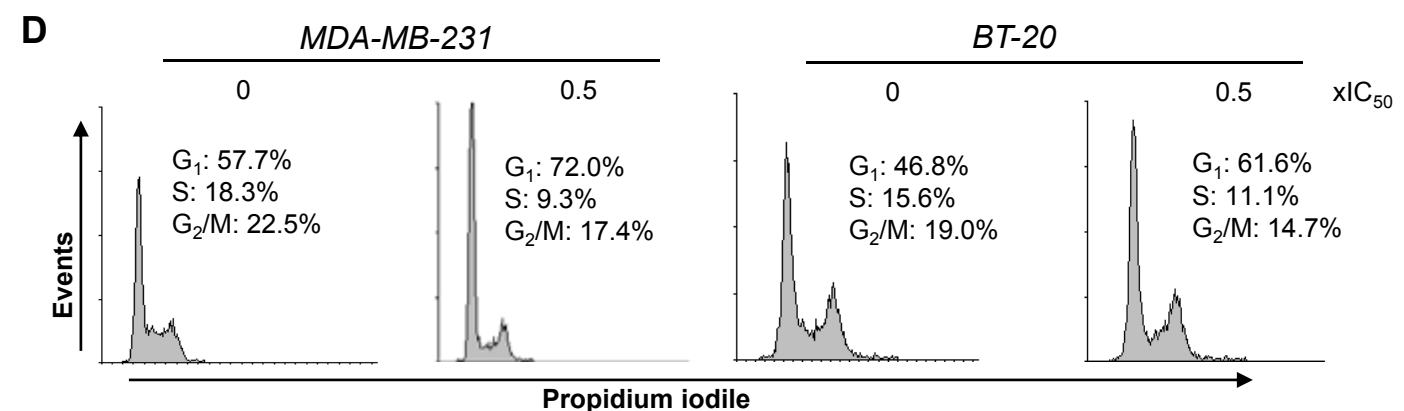

Supplement: MOESM2 [file 9466100]
